# Supplementary material for: A Bioinformatics Analysis Identifies the Telomerase Inhibitor MST-312 for Treating High-STMN1-Expressing Hepatocellular Carcinoma
Source: MDPI journal article supplement (doi:10.3390/jpm11050332), 2021-04-22
Supplement: s1 [file s1]

**Table S1. The STMN1-co-expressed genes in hepatocellular carcinoma.**

| TCGA-LIHC          |             | Chen Liver 2       |             | Roessler Liver 2   |             | Wurmbach Liver     |             |
|--------------------|-------------|--------------------|-------------|--------------------|-------------|--------------------|-------------|
| Genes <sup>1</sup> | Correlation | Genes <sup>1</sup> | Correlation | Genes <sup>2</sup> | Correlation | Genes <sup>3</sup> | Correlation |
| KIFC1              | 0.829       | ZWINT              | 0.815       | BIRC5              | 0.805       | DTL                | 0.885       |
| KIF2C              | 0.826       | TOP2A              | 0.802       | BUB1B              | 0.805       | KIAA0101           | 0.885       |
| CDC20              | 0.825       | NUSAP1             | 0.802       | CCNB1              | 0.805       | ZWINT              | 0.885       |
| RAD54L             | 0.824       | CDKN3              | 0.802       | CCNB2              | 0.805       | RRM2               | 0.885       |
| ZWINT              | 0.820       | PTTG1              | 0.802       | CDC20              | 0.805       | ASPM               | 0.863       |
| SPC25              | 0.819       | FOXM1              | 0.802       | CDK1               | 0.805       | SGOL2              | 0.863       |
| E2F2               | 0.818       | CDK1               | 0.802       | CDK1               | 0.805       | TOP2A              | 0.863       |
| KIF4A              | 0.813       | UBE2C              | 0.793       | CDK1               | 0.805       | HELLS              | 0.863       |
| NDC80              | 0.811       | PLK1               | 0.793       | CDKN3              | 0.805       | CEP55              | 0.863       |
| CDC25C             | 0.808       | CDCA8              | 0.793       | CKS2               | 0.805       | MAD2L1             | 0.863       |
| CENPM              | 0.807       | CENPF              | 0.776       | DBF4               | 0.805       | CENPK              | 0.863       |
| CDT1               | 0.806       | NUF2               | 0.776       | DLGAP5             | 0.805       | CCNA2              | 0.863       |
| NCAPG              | 0.804       | KIAA0101           | 0.764       | DTL                | 0.805       | GINS1              | 0.863       |
| RAD51              | 0.804       | CENPM              | 0.764       | ECT2               | 0.805       | HMMR               | 0.863       |
| ASF1B              | 0.803       | MYBL2              | 0.764       | EZH2               | 0.805       | NUSAP1             | 0.863       |
| PTTG1              | 0.803       | TPX2               | 0.733       | FANCI              | 0.805       | NUSAP1             | 0.863       |
| TROAP              | 0.801       | TYMS               | 0.729       | FANCI              | 0.805       | CENPE              | 0.863       |
| OIP5               | 0.800       | CDCA5              | 0.729       | FEN1               | 0.805       | CCNA2              | 0.863       |
| TACC3              | 0.799       | MAD2L1             | 0.713       | FOXM1              | 0.805       | KIF14              | 0.863       |
| SKA1               | 0.796       | CEP55              | 0.713       | GINS1              | 0.805       | DEPDC1             | 0.863       |
| CCNB2              | 0.795       | CENPW              | 0.713       | H2AFX              | 0.805       | DEPDC1             | 0.863       |
| CDCA8              | 0.793       | KIF23              | 0.713       | HN1                | 0.805       | KIF11              | 0.863       |
| CDCA3              | 0.792       | BUB1               | 0.713       | KIAA0101           | 0.805       | NUF2               | 0.863       |
| BIRC5              | 0.790       | C12orf32           | 0.687       | KIF18B             | 0.805       | CCNB2              | 0.863       |
| CDCA5              | 0.790       | FEN1               | 0.687       | KIF20A             | 0.805       | KIF2C              | 0.863       |
| CENPA              | 0.789       | UBE2T              | 0.673       | KIF4A              | 0.805       | CDC20              | 0.863       |
| SKA3               | 0.789       | ARK4A              | 0.670       | KPNA2              | 0.805       | TTK                | 0.863       |
| CDC45              | 0.786       | TRIP13             | 0.670       | KPNA2              | 0.805       | SGOL2              | 0.863       |
| CDK1               | 0.785       | NEK2               | 0.664       | MCM2               | 0.805       | CENPA              | 0.863       |
| FANCI              | 0.785       | NUF2               | 0.659       | MCM3               | 0.805       | BUB1               | 0.863       |
| TPX2               | 0.784       | NUDT1              | 0.652       | MCM6               | 0.805       | NCAPG              | 0.863       |
| RFC4               | 0.782       | CDC45              | 0.652       | MELK               | 0.805       | KIF4A              | 0.863       |
| PCLAF              | 0.778       | E2F1               | 0.652       | NEK2               | 0.805       | ANLN               | 0.863       |
| NUF2               | 0.778       | MLF1IP             | 0.644       | NUSAP1             | 0.805       | ANLN               | 0.863       |
| HJURP              | 0.777       | ASF1B              | 0.644       | NUSAP1             | 0.805       | UBE2T              | 0.863       |
| CENPH              | 0.774       | MCM6               | 0.644       | PBK                | 0.805       | PBK                | 0.863       |
| GINS1              | 0.772       | IFIT1              | 0.644       | PRC1               | 0.805       | CDK1               | 0.863       |
| HMGB2              | 0.770       | DTL                | 0.644       | PTTG1              | 0.805       | CDK1               | 0.863       |
| FAM72B             | 0.770       | FAM189B            | 0.609       | RACGAP1            | 0.805       | CDK1               | 0.863       |
| ERCC6L             | 0.768       | UBE2T              | 0.609       | RFC4               | 0.805       | NDC80              | 0.863       |
| TEDC2              | 0.768       | GMNN               | 0.609       | RRM2               | 0.805       | MELK               | 0.863       |
| MELK               | 0.767       | GMNN               | 0.609       | SMC4               | 0.805       | CDKN3              | 0.863       |
| CCNB1              | 0.767       | TMEM106C           | 0.609       | SMC4               | 0.805       | CDKN3              | 0.863       |
| KIF18B             | 0.765       | RRM2               | 0.609       | TOP2A              | 0.805       | PTTG1              | 0.863       |
| UBE2C              | 0.765       | ATAD2              | 0.609       | TOP2A              | 0.805       | RACGAP1            | 0.863       |
| PLK1               | 0.764       | ATAD2              | 0.609       | TPX2               | 0.805       | CCNB1              | 0.863       |
| PKMYT1             | 0.764       | GPC3               | 0.609       | TTK                | 0.805       | NCAPG              | 0.863       |
| E2F1               | 0.764       |                    |             | TUBG1              | 0.805       | BUB1B              | 0.863       |
| DEPDC1             | 0.763       |                    |             | TYMS               | 0.805       | PRC1               | 0.863       |
| KIF11              | 0.763       |                    |             | UBE2C              | 0.805       | DLGAP5             | 0.863       |
| MCM10              | 0.763       |                    |             | ZWINT              | 0.805       | NEK2               | 0.863       |
| LMNB1              | 0.762       |                    |             | GTSE1              | 0.804       | KIF20A             | 0.863       |
| TCF19              | 0.760       |                    |             | HJURP              | 0.804       | BIRC5              | 0.863       |
| EXO1               | 0.760       |                    |             | NCAPG              | 0.804       | TOP2A              | 0.863       |
| PIF1               | 0.759       |                    |             | NCAPG              | 0.804       | HMMR               | 0.863       |
| FANCG              | 0.757       |                    |             | TACC3              | 0.804       | CCDC99             | 0.852       |
| ORC6               | 0.756       |                    |             | KNTC1              | 0.801       | CENPW              | 0.852       |
| MCM2               | 0.755       |                    |             | MLF1IP             | 0.801       | CKAP5              | 0.848       |
| NUSAP1             | 0.755       |                    |             | BUB1               | 0.792       | C12orf48           | 0.848       |
| RRM2               | 0.755       |                    |             | CENPA              | 0.792       | NCAPG2             | 0.848       |
| DLGAP5             | 0.754       |                    |             | KIF2C              | 0.792       | FANCI              | 0.848       |
| NEK2               | 0.753       |                    |             | MAD2L1             | 0.792       | MCM7               | 0.848       |
| MYBL2              | 0.753       |                    |             | NDC80              | 0.792       | MCM7               | 0.848       |
| ORC1               | 0.753       |                    |             | OIP5               | 0.792       | DTL                | 0.848       |
| AURKB              | 0.750       |                    |             | DTYMK              | 0.78        | FANCD2             | 0.841       |
| WDR62              | 0.748       |                    |             | MCM4               | 0.771       | FAM54A             | 0.841       |
| KIF23              | 0.748       |                    |             | MCM4               | 0.771       | SKA1               | 0.841       |

|          |       |  |  |          |       |          |       |
|----------|-------|--|--|----------|-------|----------|-------|
| KIF15    | 0.747 |  |  | MCM4     | 0.771 | PLK1     | 0.841 |
| CHAF1B   | 0.747 |  |  | PRKDC    | 0.771 | C12orf48 | 0.841 |
| TOP2A    | 0.746 |  |  | AURKA    | 0.766 | CENPH    | 0.841 |
| PRC1     | 0.746 |  |  | WHSC1    | 0.761 | MCM10    | 0.841 |
| CDKN3    | 0.746 |  |  | WHSC1    | 0.761 | C5orf34  | 0.841 |
| EME1     | 0.745 |  |  | CCDC99   | 0.756 | DEPDC18  | 0.841 |
| UBE2T    | 0.743 |  |  | CDC25C   | 0.756 | DEPDC1   | 0.841 |
| KIF18A   | 0.743 |  |  | HMMR     | 0.756 | KIF2C    | 0.841 |
| FANCD2   | 0.742 |  |  | HMMR     | 0.756 | GPSM2    | 0.841 |
| RNASEH2A | 0.742 |  |  | MKI67    | 0.752 | MKI67    | 0.841 |
| SGO1     | 0.741 |  |  | MKI67    | 0.752 | KIF15    | 0.841 |
| BUB1     | 0.741 |  |  | MCM5     | 0.75  | NCAPH    | 0.841 |
| CCNA2    | 0.741 |  |  | MCM5     | 0.75  | CENPF    | 0.841 |
| TICRR    | 0.741 |  |  | MCM7     | 0.75  | DIAPH3   | 0.841 |
| EZH2     | 0.740 |  |  | MCM7     | 0.75  | CDCA8    | 0.841 |
| BUB1B    | 0.740 |  |  | NCAPG2   | 0.75  | KIF23    | 0.841 |
| TUBA1B   | 0.738 |  |  | RNASEH2A | 0.75  | CDC25C   | 0.841 |
| TTK      | 0.738 |  |  | CKAP2    | 0.746 | SPC25    | 0.841 |
| NCAPH    | 0.738 |  |  | RFC3     | 0.746 | MKI67    | 0.841 |
| PHF19    | 0.737 |  |  | MSH2     | 0.744 | KIF18A   | 0.841 |
| TRIP13   | 0.737 |  |  | NUP155   | 0.744 | HJURP    | 0.841 |
| FOXMI    | 0.734 |  |  | PRIM1    | 0.744 | MKI67    | 0.841 |
| KIF20A   | 0.733 |  |  | GMNN     | 0.742 | E2F8     | 0.841 |
| CDC6     | 0.732 |  |  | GMPS     | 0.742 | CDCA5    | 0.841 |
| CENPW    | 0.731 |  |  | SAC3D1   | 0.742 | CKAP2L   | 0.841 |
| CCNF     | 0.730 |  |  | SPAG5    | 0.739 | OIP5     | 0.841 |
| DTL      | 0.728 |  |  | CCNA2    | 0.735 | BIRC5    | 0.841 |
| CEP55    | 0.728 |  |  | CCNA2    | 0.735 | MKI67    | 0.841 |
| C17ORF53 | 0.727 |  |  | CENPM    | 0.733 | FOXMI    | 0.841 |
| UHRF1    | 0.725 |  |  | FEN1     | 0.728 | KIF18B   | 0.841 |
| TRAIP    | 0.725 |  |  | POLE2    | 0.728 | CDCA3    | 0.841 |
| SHCBP1   | 0.724 |  |  | SMC2     | 0.728 | CCNB1    | 0.841 |
| FAM72D   | 0.723 |  |  | CDC6     | 0.722 | UBE2C    | 0.841 |
| MKI67    | 0.722 |  |  | CDC6     | 0.722 | NCAPD2   | 0.836 |
| AUNIP    | 0.721 |  |  | CDC7     | 0.722 | TPX2     | 0.836 |
| CDC25A   | 0.721 |  |  | TIPIN    | 0.722 | CENPN    | 0.823 |
| SGO2     | 0.721 |  |  | CEP55    | 0.715 | ASPM     | 0.823 |
| POLQ     | 0.719 |  |  | FBXO5    | 0.715 | AURKB    | 0.823 |
| RM12     | 0.718 |  |  | KIF11    | 0.715 | SHCBP1   | 0.823 |
| PARBPB   | 0.716 |  |  | KIF15    | 0.715 | TRIP13   | 0.823 |
| DSN1     | 0.715 |  |  | KIF23    | 0.715 | STIL     | 0.813 |
| H2AFZ    | 0.715 |  |  | SPC25    | 0.715 | ORC6L    | 0.810 |
| CIP2A    | 0.714 |  |  | E2F8     | 0.709 | FANCG    | 0.810 |
| SPDL1    | 0.712 |  |  | STIL     | 0.709 | MCM8     | 0.810 |
| TK1      | 0.711 |  |  | AURKB    | 0.705 | KNTC1    | 0.810 |
| CDCA2    | 0.710 |  |  | CDCA3    | 0.705 | UHRF1    | 0.810 |
| NRM      | 0.709 |  |  | TROAP    | 0.705 | CENPL    | 0.806 |
| MCM7     | 0.709 |  |  |          |       | UBE2S    | 0.802 |
| PLK4     | 0.709 |  |  |          |       | EZH2     | 0.802 |
| GIN52    | 0.709 |  |  |          |       | KIF14    | 0.802 |
| STIL     | 0.709 |  |  |          |       | RFC4     | 0.802 |
| FBXO43   | 0.709 |  |  |          |       | ECT2     | 0.802 |
| MCM6     | 0.707 |  |  |          |       | AUKRA    | 0.802 |
| CENPE    | 0.705 |  |  |          |       |          |       |
| MTFR2    | 0.705 |  |  |          |       |          |       |
| MAD2L1   | 0.705 |  |  |          |       |          |       |
| TYMS     | 0.704 |  |  |          |       |          |       |
| DEPDC1B  | 0.704 |  |  |          |       |          |       |
| FANCB    | 0.701 |  |  |          |       |          |       |
| HMMR     | 0.700 |  |  |          |       |          |       |
| HELLS    | 0.700 |  |  |          |       |          |       |
| MCM5     | 0.700 |  |  |          |       |          |       |

<sup>1</sup> Only genes with the correlation score more than 0.7 were shown. <sup>2</sup> Only genes with the correlation score more than 0.6 were shown. <sup>3</sup> Only genes with the correlation score more than 0.6 were shown.

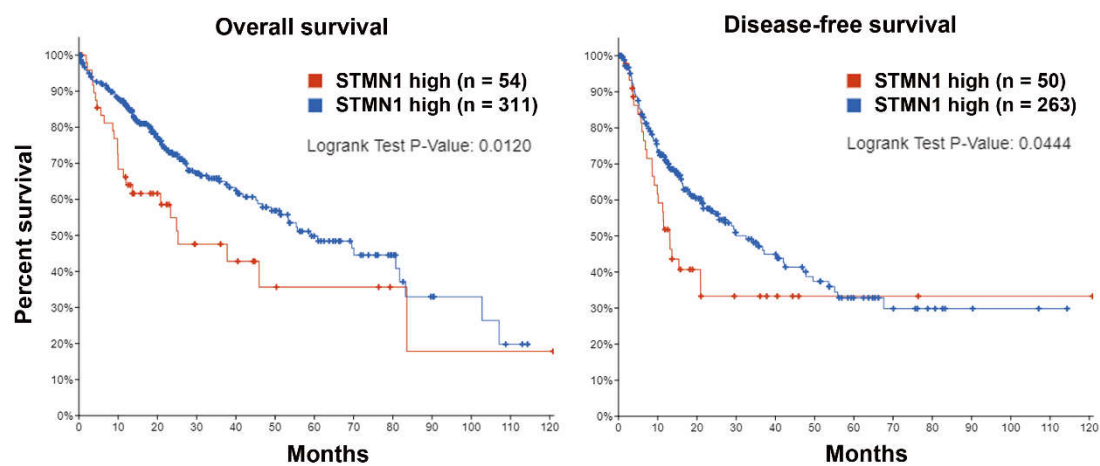

**Figure S1.** The impact of STMN1 mRNA expression on the overall and disease-free survivals of HCC patients: The Kaplan-Meier survival plots were generated through the cBioPortal website. The group cutoff value was the STMN1 mRNA expression z-score = 1.

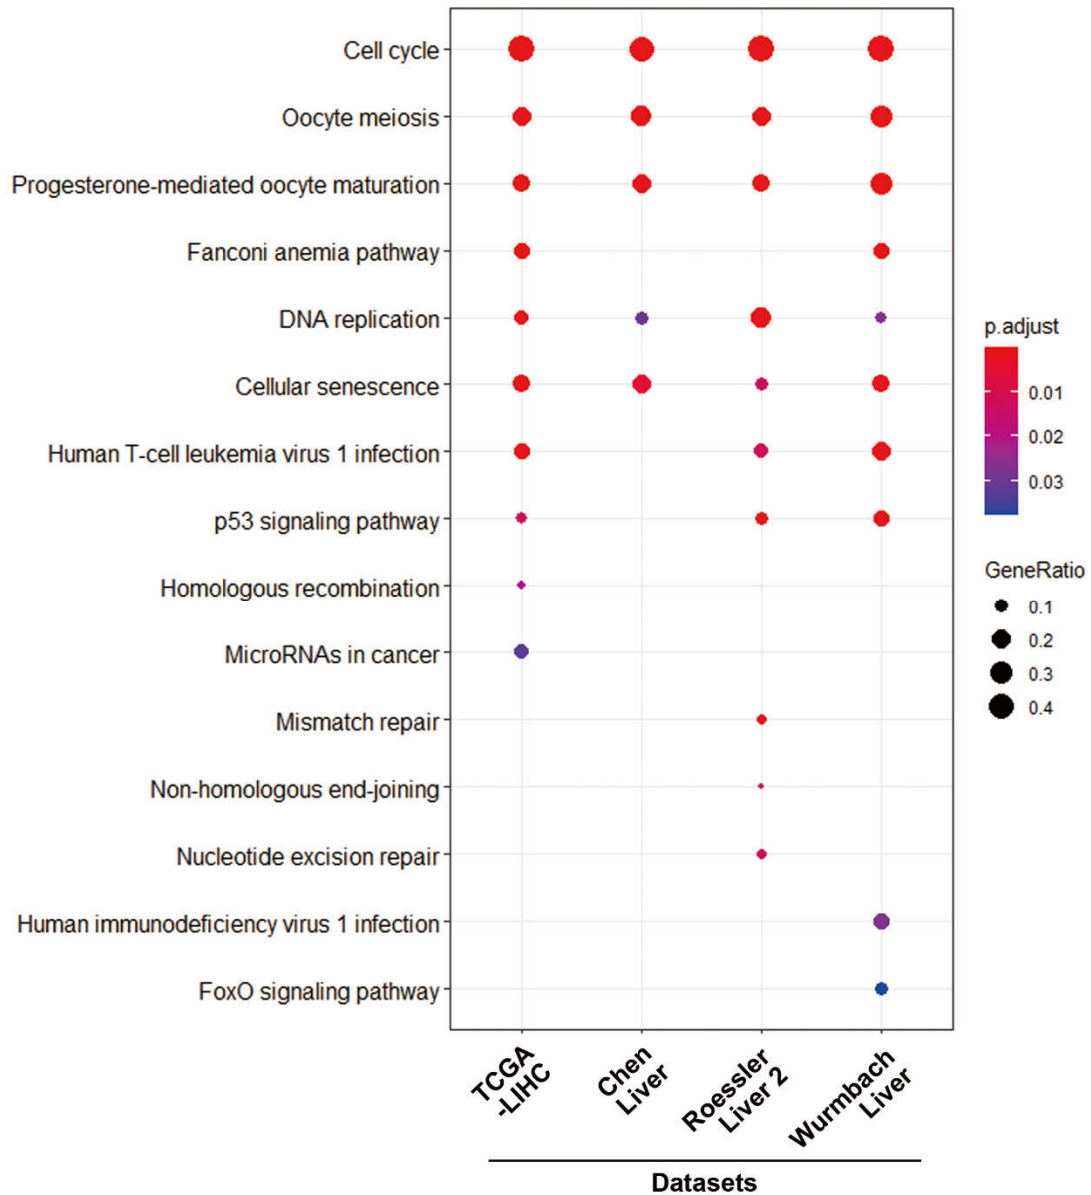

**Figure S2.** A dot plot showing the results of KEGG pathway enrichment in 4 datasets: STMN1-co-expressed genes in TCGA-LIHC, Chen Liver, Roessler Liver 2, and Wurmbach Liver datasets were analyzed using the clusterProfiler package in R for KEGG pathway enrichment.

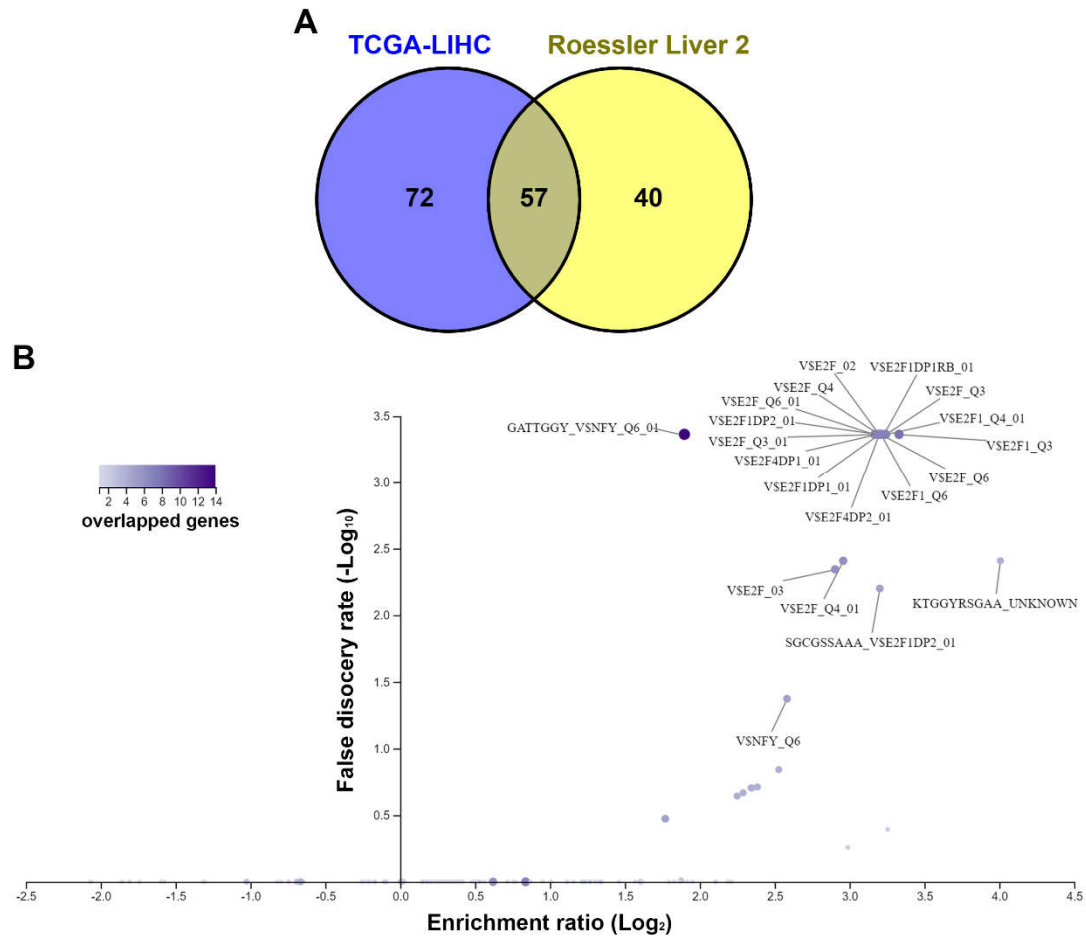

**Figure S3.** Prediction of the upstream transcription regulators for STMN1-co-expressed genes: (a) A Venn diagram showed the overlapped gene numbers for the STMN1-co-expressed genes in the TCGA-LIHC and Roessler Liver 2 datasets. The figure was generated using the VENNY 2.1 (<https://bioinfo.gp.cnb.csic.es/tools/venny/>); (b) The upstream transcription regulators for 57 common genes were predicted using the WebGestalt online tool.
